# Supplementary material for: Visible-light driven photocatalytic hydrogen generation by water-soluble all-inorganic core–shell silicon quantum dots
Source: Royal Society of Chemistry journal article supplement (doi:10.1039/d0ta01071e), 2020-01-01
Supplement: d0ta01071e1.pdf [file d0ta01071e1.pdf]

## Supporting Information

### Visible-Light Driven Photocatalytic Hydrogen Generation by Water-Soluble All-Inorganic Core-Shell Silicon Quantum Dots

Hiroshi Sugimoto, Hao Zhou, Miho Takada, Junichiro Fushimi and Minoru Fujii

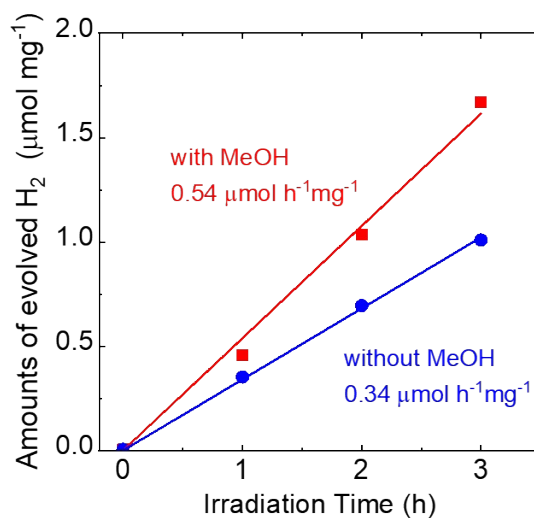

**Figure S1.** Amounts of evolved H<sub>2</sub> of codoped Si QDs (1150°C) with and without methanol as a function of light irradiation time.

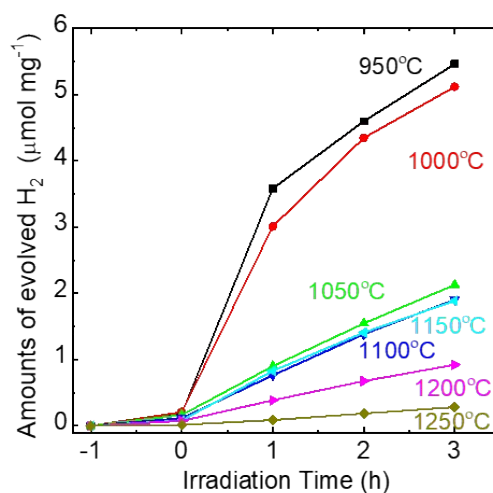

**Figure S2.** Amounts of evolved H<sub>2</sub> of codoped Si QDs with different  $T_a$  as a function of light irradiation time. Light irradiation starts at time 0 h.

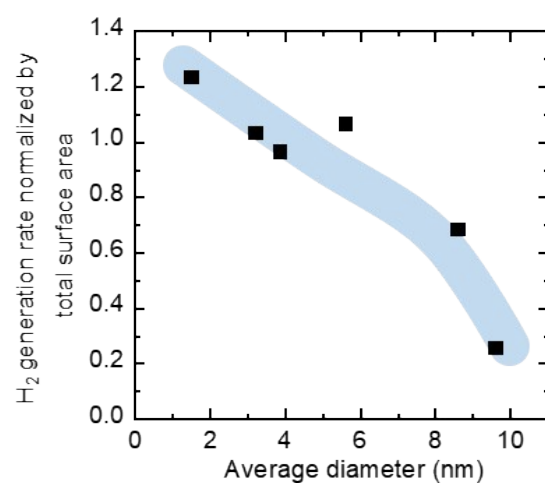

**Figure S3.** H<sub>2</sub> generation rate normalized by the relative numbers of absorbed photons and total surface area as a function of average diameters of QDs.
